# Supplementary material for: Alanine–Glyoxylate Aminotransferase Sustains Cancer Stemness Properties through the Upregulation of SOX2 and OCT4 in Hepatocellular Carcinoma Cells
Source: MDPI journal article supplement (doi:10.3390/biom12050668), 2022-05-05
Supplement: s1 [file s1]

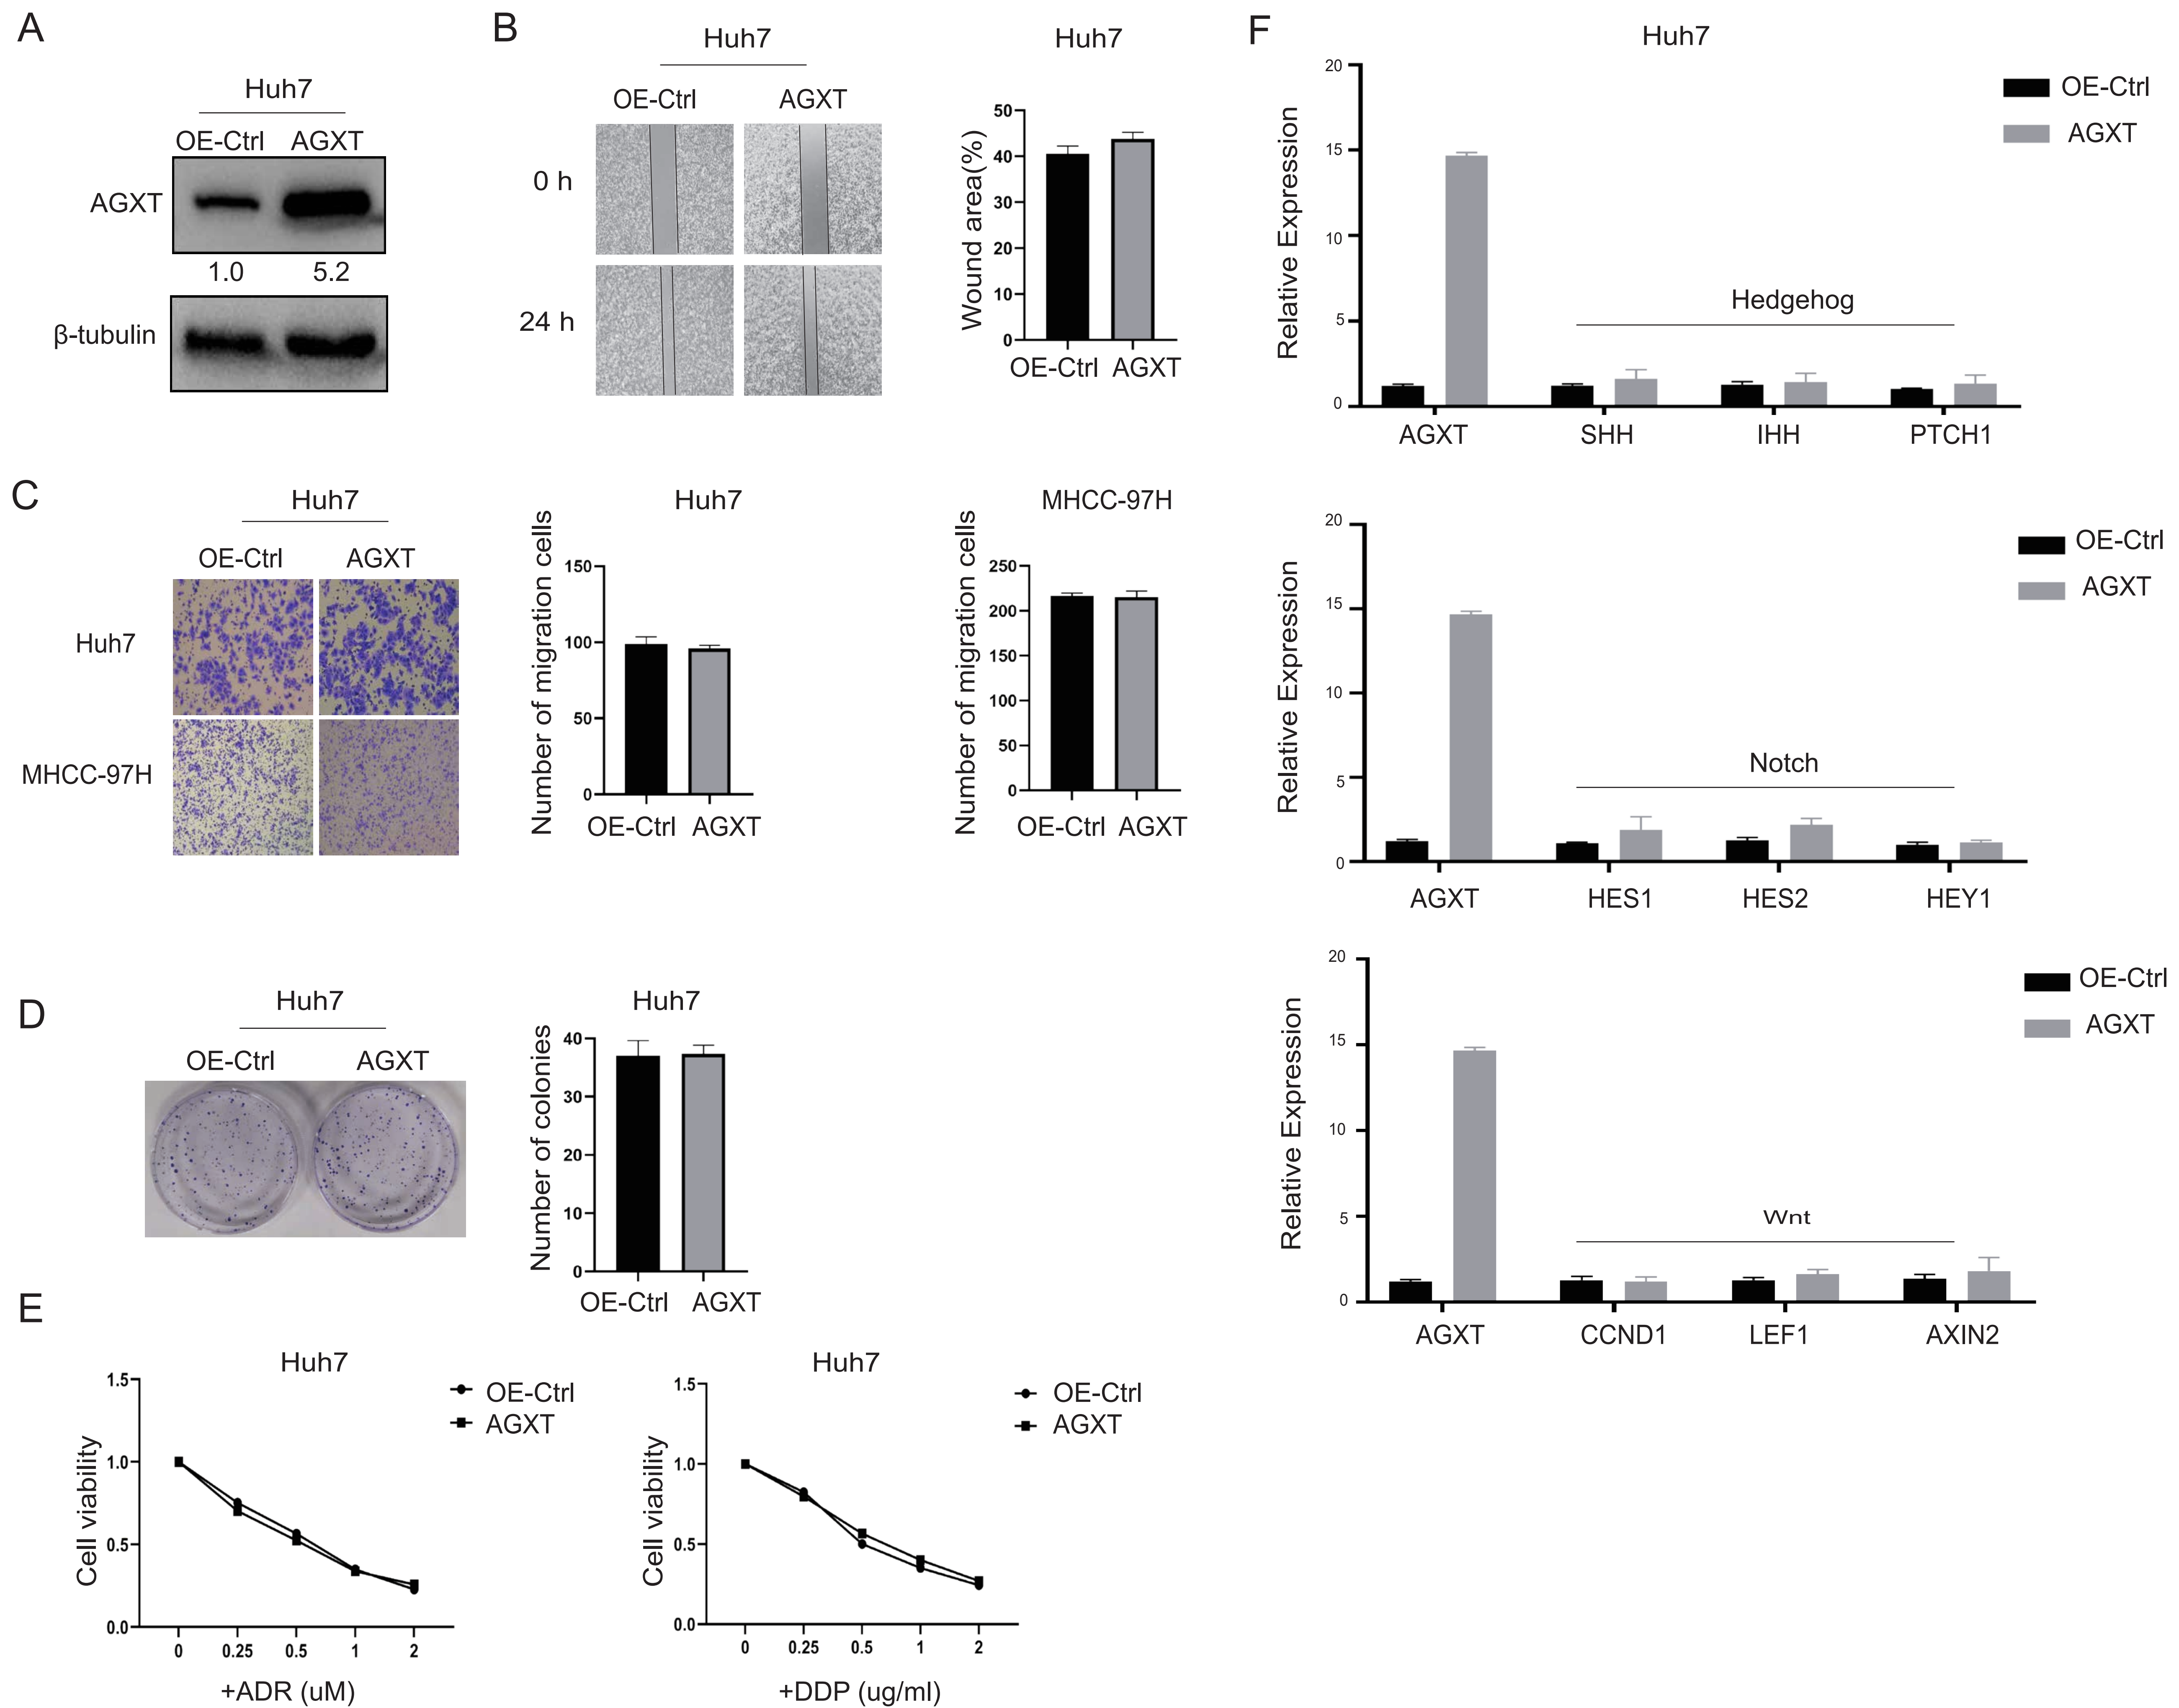

**Supplementary Figure S1.** Elevated expression of AGXT cannot affect tumor migration, proliferation, drug resistance and stemness-related pathways. (A) Overexpression of AGXT in Huh7 cells. (B) Scratch wound healing assay of AGXT overexpression Huh7 cells and control cells (left panel). Quantification of the wound closure in the scratch assay (right panel). (C) The transwell migration assay of 24 hours in AGXT overexpression Huh7 cells and MHCC-97H cells (left panel). Statistical analysis of cells migration ability in transwell assay (right panel). (D) Soft agar colony formation assay of Huh7 cells with AGXT overexpression or control cells (left panel). Statistical analysis of colony numbers (right panel). (E) Huh7 cells with AGXT overexpression or control cells were treated with adriamycin (ADR) and cisplatin (DDP) for 24 h. Cell viability was analyzed by the CCK8 assay. (F) qRT-PCR analysis of Hedgehog, Notch and Wnt pathways in AGXT Huh7 cells with AGXT overexpression or control cells. \*  $p < 0.05$ , \*\*  $p < 0.01$ , \*\*\*  $p < 0.001$ , n.s., nonsignificant.
